# Supplementary material for: DNA methylation study of Huntington’s disease and motor progression in patients and in animal models
Source: PubMed Central journal article supplement (PMC7484780; doi:10.1038/s41467-020-18255-5), 2020-09-10
Supplement: 41467_2020_18255_MOESM2_ESM.pdf [file 41467_2020_18255_MOESM2_ESM.pdf]

## **Description of Additional Supplementary Files**

File Name: Supplementary Data 1

Description: Top hits EWAS of HD disease status across human, mouse and sheep

File Name: Supplementary Data 2

Description: Series of Multivariate regression analysis of joint effect of CAG length alleles on HTT methylation

File Name: Supplementary Data 3

Description: Top hits EWAS of HD motor progression across Enroll-HD and Registry-HD

File Name: Supplementary Data 4

Description: CpGs close to the CAG expansion are hypermethylated in HD

File Name: Supplementary Data 5

Description: Contribution to the collection of the Enroll-HD data. Individuals who contributed to the collection of the Enroll-HD data are listed in the pdf downloaded from <https://www.enroll-hd.org/acknowledgments/>
