# Supplementary material for: DNA methylation study of Huntington’s disease and motor progression in patients and in animal models
Source: PubMed Central journal article supplement (PMC7484780; doi:10.1038/s41467-020-18255-5), 2020-09-10
Supplement: 41467_2020_18255_MOESM7_ESM.pdf [file 41467_2020_18255_MOESM7_ESM.pdf]

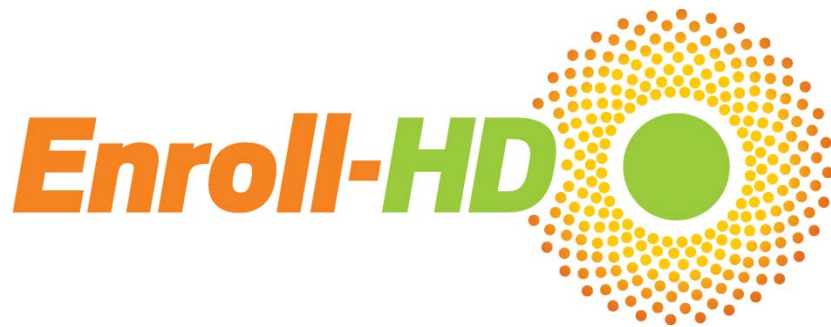

PDS4 | 2018-10-R1

Periodic Dataset 4

Acknowledgement list

Version 2018-10-R1

Enroll-HD

A worldwide observational study for Huntington's  
disease families

A CHDI Foundation Project

| Site                 | Country     | Name                        |
|----------------------|-------------|-----------------------------|
| AarhusUnivHosp       | Denmark     | Anette Torvin Møller        |
| AarhusUnivHosp       | Denmark     | Charlotte Germann Odgaard   |
| AlbanyMedCol         | USA         | Era Hanspal                 |
| AlbanyMedCol         | USA         | Sharon Evans                |
| AssistPubHospParis   | France      | Anne-Catherine Bachoud-Levi |
| AssistPubHospParis   | France      | Celine Joannet              |
| AucklandCityHosp     | New Zealand | Richard Roxburgh            |
| AucklandCityHosp     | New Zealand | Virginia Hogg               |
| AucklandCityHosp     | New Zealand | Lisa Fraser                 |
| AugustaUniv          | USA         | John Morgan                 |
| AugustaUniv          | USA         | Paula Jackson               |
| AvonWiltMenHeaPartTr | UK          | Lesley Gowers               |
| AvonWiltMenHeaPartTr | UK          | Carol Hall                  |
| AyrshireHealthBoard  | UK          | Margo Henry                 |
| AyrshireHealthBoard  | UK          | Tim Johnston                |
| AziendaOspedSanAndre | Italy       | Michela Ferraldeschi.       |
| AziendaOspedSanAndre | Italy       | Giovanni Ristori            |
| AziendaOspedSanAndre | Italy       | Silvia Romano               |
| BaylorCollMed        | USA         | Danielle Peacock            |
| BaylorCollMed        | USA         | Christine Hunter, RN        |
| BaylorCollMed        | USA         | Joseph Jankovic, MD         |
| BeaumontHosp         | Ireland     | Ms Fiona O'Donovan          |
| BeaumontHosp         | Ireland     | Orla Hardiman               |
| BeaumontHosp         | Ireland     | Sinead Maguire              |
| BeaumontHosp         | Ireland     | Samira Bouazzaoui           |
| BeaumontHosp         | Ireland     | Niall Pender                |
| BeauVallon           | Belgium     | Lamia Guettat               |
| BeauVallon           | Belgium     | Jean Marie Warzee           |
| BirmSolNHSFounTrust  | UK          | Ellice Parkinson            |
| BirmSolNHSFounTrust  | UK          | Hugh Rickards               |
| BordeauxUnivHosp     | France      | Cyril Goizet                |
| BordeauxUnivHosp     | France      | Marie-Pierre Baudier        |
| BostonMedCtr         | USA         | Raymond James               |
| BostonMedCtr         | USA         | Marie Saint-Hilaire         |
| BurgosFoun           | Spain       | Esther Cubo                 |
| BurgosFoun           | Spain       | Natividad Mariscgal         |
| CardiffUniv          | UK          | Anne Rosser                 |
| CardiffUniv          | UK          | Rebecca Cousins             |
| CardiffUniv          | UK          | Thomas Massey               |
| CardiffUniv          | UK          | Duncan McLauchlan           |
| CardiffUniv          | UK          | Monica Busse                |
| CCFLouRuvo           | USA         | Zoltan Mari, MD             |
| CCFLouRuvo           | USA         | Hooman Honar                |

| Site                   | Country     | Name                      |
|------------------------|-------------|---------------------------|
| CenterMovDis           | Canada      | Teena Kailasanathan       |
| CenterMovDis           | Canada      | Kimberly Thompson         |
| CenterMovDis           | Canada      | Mark Guttman              |
| CentHospUnivMontreal   | Canada      | Lyne Jean                 |
| CentHospUnivMontreal   | Canada      | Sylvain Chouinard         |
| CentManHospFounTrust   | UK          | Helen Chadwick            |
| CentManHospFounTrust   | UK          | David Craufurd            |
| CentManHospFounTrust   | UK          | Dawn Rogers               |
| CentManHospFounTrust   | UK          | Iris Trender-Gerhard      |
| CentManHospFounTrust   | UK          | Liz Howard                |
| CETRAM                 | Chile       | Maria Consuelo Moos       |
| CETRAM                 | Chile       | Pedro Chana               |
| CETRAM                 | Chile       | Natalia Rojas             |
| ClermontFerrandHosp    | France      | Ana-Raquel Marques        |
| ClermontFerrandHosp    | France      | Dihya Benghadid           |
| ClevelandClinicFoun    | USA         | Chris Firestone           |
| ClevelandClinicFoun    | USA         | Anwar Ahmed               |
| ClinTriCtrMaastricht   | Netherlands | Mayke Oosterloo           |
| ClinTriCtrMaastricht   | Netherlands | Joelle Sondeijker         |
| ColoSpringsNeuroAssoc  | USA         | Christen Kutz             |
| ColoSpringsNeuroAssoc  | USA         | Alicia (Lisa) Deschaine   |
| ColumbiaUniv           | USA         | Hiral Shah                |
| ColumbiaUniv           | USA         | Ashwini Rao               |
| ColumbiaUniv           | USA         | Lori Quinn                |
| ColumbiaUniv           | USA         | Ronda Clouse              |
| ColumbiaUniv           | USA         | Massood Manoochehri       |
| ColumbiaUniv           | USA         | Karen Marder              |
| ColumbiaUniv           | USA         | Paula Wasserman           |
| CooperHealth           | USA         | Amy Colcher               |
| CooperHealth           | USA         | Justin Frisby             |
| CopernicusPodLec       | Poland      | Agnieszka Konkell         |
| CopernicusPodLec       | Poland      | Witold Soltan             |
| CrucesHosp             | Spain       | Juan Carlos Gómez Esteban |
| CrucesHosp             | Spain       | Maria Angeles Acera Gil   |
| CtrHospUnivAmiens      | France      | Pierre Krystkowiak        |
| CtrHospUnivAmiens      | France      | Stéphanie Blin            |
| CtrHospUnivAngers      | France      | Christophe Verny          |
| CtrHospUnivAngers      | France      | Audrey Olivier            |
| CtrHospUnivMontpellier | France      | Cecilia Marelli           |
| CtrHospUnivMontpellier | France      | Diana Ban                 |
| DukeUniv               | USA         | Lisa Gauger               |
| DukeUniv               | USA         | Burton Scott              |
| EmoryUniv              | USA         | Elaine Sperin             |

| Site                           | Country   | Name                        |
|--------------------------------|-----------|-----------------------------|
| EmoryUniv                      | USA       | Jaime Hatcher-Martin        |
| EmoryUniv                      | USA       | Stewart Factor              |
| Evergreen Health               | USA       | Pinky Agarwal               |
| Evergreen Health               | USA       | Anna Fierro                 |
| FifeHealthBoard                | UK        | Michael Armanyous           |
| FifeHealthBoard                | UK        | Nicola Johns                |
| FundHospUnivLaFe               | Spain     | Carmen Peiro                |
| FundHospUnivLaFe               | Spain     | Francisco Castera Brugada   |
| GeorgeHuntingtonInst           | Germany   | Herwig Lange                |
| GeorgeHuntingtonInst           | Germany   | Ralf Reilmann               |
| GeorgeHuntingtonInst           | Germany   | Stefan Bohlen               |
| GeorgeHuntingtonInst           | Germany   | Anja Kletsch                |
| GeorgetownUniv                 | USA       | Karen Anderson              |
| GeorgetownUniv                 | USA       | Natasha Scott               |
| GreatGlasgowHealthBoard        | UK        | Murray Sutherland           |
| GreatGlasgowHealthBoard        | UK        | Stuart Ritchie              |
| GuyandStThomFounTrust          | UK        | Deborah Ruddy               |
| GuyandStThomFounTrust          | UK        | Dene Robertson              |
| GuyandStThomFounTrust          | UK        | Elizabeth White             |
| GuyandStThomFounTrust          | UK        | Thomasin Andrews            |
| Hennepin County Medical Center | USA       | Dawn Radtke                 |
| Hennepin County Medical Center | USA       | Martha Nance                |
| HNDC                           | USA       | Gregory Suter               |
| HNDC                           | USA       | William M Mallonee          |
| HospCreuSantPau                | Spain     | Andrea Horta                |
| HospCreuSantPau                | Spain     | Jaime Kulisevsky            |
| HospInfantChrisBadaj           | Spain     | Carmen Durán Herrera        |
| HospInfantChrisBadaj           | Spain     | Patrocinio García Moreno    |
| HospMareMerce                  | Spain     | Elvira Roca Goma            |
| HospMareMerce                  | Spain     | Jesús Miguel Ruíz Idiago    |
| HospMarseille                  | France    | Jean-Philippe Azulay        |
| HospMarseille                  | France    | Laura Mundler               |
| HospUnivBellvitge              | Spain     | Matilde Calopa              |
| HospUnivBellvitge              | Spain     | Jordi Bas                   |
| IndianaUniv                    | USA       | Chris James                 |
| IndianaUniv                    | USA       | Andrea Hurt                 |
| InstCervMoelle                 | France    | Alexandra Durr              |
| InstCervMoelle                 | France    | Marie Biet                  |
| InstNeuroBuenoAires            | Argentina | Martin Cesarini             |
| InstNeuroBuenoAires            | Argentina | Emilia Gatto                |
| InstPathGenCharleroi           | Belgium   | Christine Verellen-Dumoulin |
| InstPathGenCharleroi           | Belgium   | Cécile Minet                |
| InstPsychandNeuro              | Poland    | Grzegorz Witkowski          |

| Site                                   | Country     | Name                         |
|----------------------------------------|-------------|------------------------------|
| InstPsychandNeuro                      | Poland      | Iwona Stepniak               |
| JimenDiazFoun                          | Spain       | Pedro J Garcia Ruiz          |
| JimenDiazFoun                          | Spain       | Asunción Martínez            |
| JohnsHopkinsUniv                       | USA         | Frederick C. Nucifora Jr.    |
| JohnsHopkinsUniv                       | USA         | Christopher Ross             |
| JohnsHopkinsUniv                       | USA         | Mollie Jenckes               |
| KbolsarAmpKlinTauf                     | Germany     | Matthias Dose                |
| KbolsarAmpKlinTauf                     | Germany     | Michael Bachmaier            |
| KbolsarAmpKlinTauf                     | Germany     | Ralf Marquard                |
| KrakowskaAkademiaNeuro                 | Poland      | Monica Rudzinska             |
| KrakowskaAkademiaNeuro                 | Poland      | Marta Golosz                 |
| LeedsTeachHospTrust                    | UK          | Alison Kraus                 |
| LeedsTeachHospTrust                    | UK          | Stuart Jamieson              |
| LeedsTeachHospTrust                    | UK          | Ivana Markova                |
| LeedsTeachHospTrust                    | UK          | Emma Hobson                  |
| LeedsTeachHospTrust                    | UK          | Callum Schofield             |
| LegaltalRiceHunt                       | Italy       | Simone Migliore              |
| LegaltalRiceHunt                       | Italy       | Sabrina Maffi                |
| LegaltalRiceHunt                       | Italy       | Maria Giovanna Dema          |
| LegaltalRiceHunt                       | Italy       | Barbara D'Alessio            |
| LegaltalRiceHunt                       | Italy       | Ferdinando Squitieri         |
| Leicestershire                         | UK          | Dawn Freire-Patino           |
| Leicestershire                         | UK          | Caroline Hallam              |
| Leicestershire                         | UK          | Reza Kiani                   |
| LeidenUniv                             | Netherlands | Raymund Roos                 |
| LeidenUniv                             | Netherlands | Marye Hogenboom              |
| LilleUnivHosp                          | France      | Clémence Simonin             |
| LilleUnivHosp                          | France      | Eric Decorte                 |
| Lisbon-Central                         | Portugal    | Ana Calado                   |
| Lisbon-Instituto de Medicina Molecular | Portugal    | Joaquim J Ferreira           |
| LomaLindaUniv                          | USA         | Dharmaseeli Moses            |
| LothianHealthBoard                     | UK          | Philip Greene                |
| LothianHealthBoard                     | UK          | Marie McGill                 |
| LothianHealthBoard                     | UK          | Mary Porteous                |
| MilanGenetic                           | Italy       | Anna Castaldo                |
| MilanGenetic                           | Italy       | Caterina Mariotti            |
| MilanGenetic                           | Italy       | Lorenzo Nanetti              |
| MilanNeuro                             | Italy       | Dominga Paridi               |
| MilanNeuro                             | Italy       | Paola Soliveri               |
| MilanNeuro                             | Italy       | Simona Castagliuolo          |
| MonashUniv                             | Australia   | Nellie Georgious-Karistianis |
| MonashUniv                             | Australia   | Lisa Mottram                 |
| MonashUniv                             | Australia   | Katie Fitzgerald             |

| Site                  | Country   | Name                          |
|-----------------------|-----------|-------------------------------|
| MonashUniv            | Australia | Julie Stout                   |
| NHSForthValley        | UK        | David Thomson                 |
| NorStaffCombHeaTrust  | UK        | George El-Nimr                |
| NorStaffCombHeaTrust  | UK        | Karen Kennedy                 |
| NorthBristolTrust     | UK        | Catherine Pennington          |
| NorthBristolTrust     | UK        | Serena Dillon                 |
| NorthBristolTrust     | UK        | Elizabeth Coulthard           |
| NorthBristolTrust     | UK        | Louise Gethin                 |
| NorthMetroHlthServ    | Australia | Jacenta Abbott                |
| NorthMetroHlthServ    | Australia | Karen Clunies-Ross            |
| NorthMetroHlthServ    | Australia | Peter Panegyres               |
| NorthumbTyneFreeman   | UK        | Jill Davison                  |
| NorthumbTyneFreeman   | UK        | Suresh Komati                 |
| NorthumbTyneFreeman   | UK        | Sarah Edwards                 |
| NorthYorkGen          | Canada    | Wai Lun Alan Fung             |
| NorthYorkGen          | Canada    | Clare Gibbons                 |
| OhioStateUniv         | USA       | Allison Daley                 |
| OhioStateUniv         | USA       | Sandra Kostyk                 |
| OhioStateUniv         | USA       | Katherine Ambrogi             |
| OhioStateUniv         | USA       | Areej Tariq                   |
| OxfordUnivHospTrust   | UK        | Andrea H Nemeth               |
| OxfordUnivHospTrust   | UK        | Sarsha Wilson                 |
| ParaElenaKlinikKassel | Germany   | Katrin Bürk                   |
| ParaElenaKlinikKassel | Germany   | Claudia Trenkwalder           |
| ParaElenaKlinikKassel | Germany   | Grit Langhans                 |
| PlyHospNHSTrust       | UK        | Julie Frost                   |
| PlyHospNHSTrust       | UK        | Rupert Noad                   |
| PlyHospNHSTrust       | UK        | Jemma Inches                  |
| PooleHospFounTrust    | UK        | Annemieke Fox                 |
| PooleHospFounTrust    | UK        | John Burn                     |
| PoznanUniv            | Poland    | Daniel Zielonka               |
| PoznanUniv            | Poland    | Elżbieta Alicja Puch          |
| RamonCajalUnivHosp    | Spain     | José Luis López-Sendón Moreno |
| RamonCajalUnivHosp    | Spain     | Verónica Mañanes Barral       |
| RockyMtnMovDis        | USA       | Liza Heap                     |
| RockyMtnMovDis        | USA       | Rajeev Kumar                  |
| RoyalDevExetFounTrst  | UK        | Sarah Irvine                  |
| RoyalDevExetFounTrst  | UK        | Timothy Harrower              |
| RoyBerkNHSFounTrust   | UK        | Anita Foster                  |
| RoyBerkNHSFounTrust   | UK        | Richard Armstrong             |
| RushUniv              | USA       | Alice Negron                  |
| RushUniv              | USA       | Jennifer Goldman              |
| RutgersUniv           | USA       | Daniel Schneider              |
| RutgersUniv           | USA       | Sheila Redding                |

| Site                     | Country     | Name                     |
|--------------------------|-------------|--------------------------|
| SanfordResearch          | USA         | Tish Skarloken           |
| SanfordResearch          | USA         | Tanya Harlow             |
| SanfordResearch          | USA         | Destini Spaeth           |
| SchleswigHolsteinHosp    | Germany     | Alexander Münchau        |
| SchleswigHolsteinHosp    | Germany     | Vera Tadic               |
| SchleswigHolsteinHosp    | Germany     | Klaus Gehring            |
| SheffieldChildFouTru     | UK          | Anya Kholkina            |
| SheffieldChildFouTru     | UK          | Oliver Quarrell          |
| SilesianMedUnivKatowice  | Poland      | Klaudia Plinta           |
| SiloahAG                 | Switzerland | Jean-Marc Burgunder      |
| SiloahAG                 | Switzerland | Jessica Koehli           |
| SonEspasesHosp           | Spain       | Penélope Navas Arques    |
| SonEspasesHosp           | Spain       | Ines Legarda             |
| SouthamptonUnivHospTrust | UK          | Christopher Kipps        |
| SouthamptonUnivHospTrust | UK          | Veena Agarwal            |
| StAndrewsHealth          | UK          | Elvina Chu               |
| StGeorgeHealthTrust      | UK          | Nayana Lahiri            |
| StGeorgeHealthTrust      | UK          | Uruj Anjum               |
| StJosefAndElisabethHosp  | Germany     | Carsten Saft             |
| StJosefAndElisabethHosp  | Germany     | Rainer Hoffmann          |
| StJosefAndElisabethHosp  | Germany     | Sarah von Hein           |
| StJosefAndElisabethHosp  | Germany     | Barbara Daniela Kaminski |
| StJosefAndElisabethHosp  | Germany     | Jannis Achenbach         |
| STJosephHosp             | USA         | Ryan Heeney              |
| STJosephHosp             | USA         | Srivadee Oravivattanakul |
| StrasbourgUnivHosp       | France      | Christine Tranchant      |
| StrasbourgUnivHosp       | France      | Fanny Huselstein         |
| Tayside                  | UK          | Alison Tonner            |
| Tayside                  | UK          | Lindsay Wilson           |
| Tayside                  | UK          | David Goudie             |
| Tayside                  | UK          | Paula McFadyen           |
| TechUnivMunich           | Germany     | Adolf Weindl             |
| TechUnivMunich           | Germany     | Antje Lüsebrink          |
| ToulouseUnivHosp         | France      | Fabienne Calvas          |
| ToulouseUnivHosp         | France      | Brigitte Pouzet          |
| UnivAberdeen             | UK          | Daniela Rae              |
| UnivAberdeen             | UK          | Alisdair Ross            |
| UnivAberdeen             | UK          | Stella Sihlabela         |
| UnivAberdeen             | UK          | Zosia Miedzybrodzka      |
| UnivAlaBirm              | USA         | Victor Sung              |
| UnivAlaBirm              | USA         | Jenna Smith              |
| UnivAlberta              | Canada      | Oksana Suchowersky       |
| UnivAlberta              | Canada      | Paul McCann              |

| Site                  | Country | Name                     |
|-----------------------|---------|--------------------------|
| UnivAlbertaGlenrose   | Canada  | Pam King                 |
| UnivAlbertaGlenrose   | Canada  | Wayne Martin             |
| UnivBari              | Italy   | Marina de Tommaso        |
| UnivBari              | Italy   | Marianna Delussi         |
| UnivBologna           | Italy   | Cesa Scaglione           |
| UnivBologna           | Italy   | Pietro Cortelli          |
| UnivBritishCol        | Canada  | Tuan Le                  |
| UnivBritishCol        | Canada  | Lynn Raymond             |
| UnivBritishCol        | Canada  | Blair Leavitt            |
| UnivCalDavis          | USA     | Alexandra (Sasha) Duffy  |
| UnivCalDavis          | USA     | Amanda Martin            |
| UnivCalDavis          | USA     | Ashok Joshua Dayananthan |
| UnivCalDavis          | USA     | Vicki Wheelock           |
| UnivCalgary           | Canada  | Lorelei Tainsh (Derwent) |
| UnivCalgary           | Canada  | Justyna Sarna            |
| UnivCallrvine         | USA     | Nicolas Phielipp         |
| UnivCallrvine         | USA     | Breana Chew              |
| UnivCalLosAngeles     | USA     | Susan Perlman            |
| UnivCalLosAngeles     | USA     | Jeffrey Carpio           |
| UnivCalSanDiego       | USA     | Jody Corey-Bloom         |
| UnivCalSanDiego       | USA     | Chase Snell              |
| UnivCalSanFran        | USA     | Michael Geschwind        |
| UnivCalSanFran        | USA     | Nancy Cai                |
| UnivCalSanFran        | USA     | Alexandra Nelson         |
| UnivCambridge         | UK      | Sarah Mason              |
| UnivCambridge         | UK      | Caroline Williams-Gray   |
| UnivCambridge         | UK      | Laura Sherlock           |
| UnivCambridge         | UK      | Roger Barker             |
| UnivCattolicaSacriCur | Italy   | Flavia Torlizzi          |
| UnivCattolicaSacriCur | Italy   | Anna Rita Bentivoglio    |
| UnivCattolicaSacriCur | Italy   | Marcella Solito          |
| UnivCharite           | Germany | Josef Priller            |
| UnivCharite           | Germany | Stefanie Kehrer          |
| UnivChicago           | USA     | Joan Young               |
| UnivChicago           | USA     | Tao Xie                  |
| UnivCincinnatiPhysCo  | USA     | Andrew Duker             |
| UnivCincinnatiPhysCo  | USA     | Jessica Doak             |
| UnivCollLondon        | UK      | Ed Wild                  |
| UnivCollLondon        | UK      | Monica Lewis             |
| UnivCollLondon        | UK      | Kate Fayer               |
| UnivCollLondon        | UK      | Sarah Tabrizi            |
| UnivConnHealthCtr     | USA     | Robin Zingales-Brown     |
| UnivConnHealthCtr     | USA     | Glenn Konopaske          |



| Site                    | Country     | Name                            |
|-------------------------|-------------|---------------------------------|
| UniverMedCtrFreiburg    | Germany     | Gerit Kammel                    |
| UniverMedCtrFreiburg    | Germany     | Stephan Klebe                   |
| UniverMedCtrFreiburg    | Germany     | Michel Rijntjes                 |
| UnivFlorida             | USA         | Nikolaus McFarland              |
| UnivFlorida             | USA         | Erin Monari                     |
| UnivGenova              | Italy       | Paola Mandich                   |
| UnivGenova              | Italy       | Roberta Marchese                |
| UnivGroningen           | Netherlands | H.P.H. Kremer                   |
| UnivGroningen           | Netherlands | Maxime Vos                      |
| UnivHosGustavDresden    | Germany     | Andreas Hermann                 |
| UnivHosGustavDresden    | Germany     | Simone Schmidt                  |
| UnivHospAachen          | Germany     | Beate Schumann                  |
| UnivHospAachen          | Germany     | Kathrin Reetz                   |
| UnivHospCopenhagen      | Denmark     | Christina Vangsted Hansen       |
| UnivHospCopenhagen      | Denmark     | Jørgen Nielsen                  |
| UnivHospCopenhagen      | Denmark     | Lena E. Hjermind                |
| UnivHospCopenhagen      | Denmark     | Suzanne Granhøj Lindquist       |
| UnivHospCopenhagen      | Denmark     | Marie Nathalie Nickelsen Hellem |
| UnivHospErlangen        | Germany     | Susanne Seifert                 |
| UnivHospErlangen        | Germany     | Zacharias Kohl                  |
| UnivHospErlangen        | Germany     | Jürgen Winkler                  |
| UnivHospGiessenMarburg  | Germany     | Katrin Bürk                     |
| UnivHospLeuven          | Belgium     | Wim Vandenberghe                |
| UnivHospLeuven          | Belgium     | Petra Weckx                     |
| UnivHospOdense          | Denmark     | Lene Wermuth                    |
| UnivHospOdense          | Denmark     | Marianne Dybro Lundsgaard       |
| UnivHospUlm             | Germany     | Hela Jerbi                      |
| UnivHospUlm             | Germany     | Jan Lewerenz                    |
| UnivHospUlm             | Germany     | Michael Orth                    |
| UnivHospUlm             | Germany     | Sonja Trautmann                 |
| UnivHospUlm             | Germany     | Katrin Lindenberg               |
| UnivHospWuerzburg       | Germany     | Kerstin Nöth                    |
| UnivHospWuerzburg       | Germany     | Christine Leypold               |
| UnivHospWuerzburg       | Germany     | Kai Boelmans                    |
| UnivIllinois            | USA         | Mitch King                      |
| UnivIllinois            | USA         | Sadie Foster                    |
| UnivInnsbruck           | Austria     | Klaus Seppi                     |
| UnivInnsbruck           | Austria     | Dora Valent                     |
| UnivIowa                | USA         | Amanda Heinzerling              |
| UnivIowa                | USA         | Jane S Paulsen                  |
| UnivKansasMedCtrResInst | USA         | Carolyn Gray                    |
| UnivKansasMedCtrResInst | USA         | Richard Dubinsky                |
| UnivLouisville          | USA         | Kathrin LaFaver                 |

| Site                  | Country     | Name                   |
|-----------------------|-------------|------------------------|
| UnivLouisville        | USA         | Annette Robinson       |
| UnivMaryland          | USA         | Terra Hill             |
| UnivMaryland          | USA         | William Keller         |
| UnivMelbourne         | Australia   | Anita Goh              |
| UnivMelbourne         | Australia   | Stephanie Perin        |
| UnivMich              | USA         | Jenna Russell          |
| UnivNaples            | Italy       | Luigi di Maio          |
| UnivNaples            | Italy       | Alessandro Roca        |
| UnivNaples            | Italy       | Silvio Peluso          |
| UnivNaples            | Italy       | Elena Salvatore        |
| UnivNaples            | Italy       | Giuseppe De Michele    |
| UnivNebMedCtr         | USA         | Nick Miller            |
| UnivNebMedCtr         | USA         | Amy Hellman, MD        |
| UnivOtago             | New Zealand | Laura Paermentier      |
| UnivOtago             | New Zealand | Tim Anderson           |
| UnivPenn              | USA         | Pedro Gonzalez-Alegre  |
| UnivPenn              | USA         | Jennifer Klapper       |
| UnivPitt              | USA         | Patricia Conlon        |
| UnivPitt              | USA         | Valerie Suski          |
| UnivRochester         | USA         | Amy Chesire            |
| UnivRochester         | USA         | Frederick Marshall     |
| UnivRochester         | USA         | Justin Alves           |
| UnivSoCar             | USA         | Miroslav Cuturic       |
| UnivSoCar             | USA         | Alyson Grant           |
| UnivSouthFlorida      | USA         | Danielle Hergert       |
| UnivSouthFlorida      | USA         | Patricia Johnson       |
| UnivSouthFlorida      | USA         | Emily Kellogg          |
| UnivSouthFlorida      | USA         | Juan Sanchez-Ramos     |
| UnivSouthFlorida      | USA         | Kelly (Kollen) Elliott |
| UnivTenn              | USA         | Mark LeDoux            |
| UnivTenn              | USA         | Amanda Nolte           |
| UnivTexasHlthCntrHous | USA         | Erin Furr Stimming     |
| UnivTexasHlthCntrHous | USA         | Jamie Sims             |
| UnivUtah              | USA         | Meghan Zorn            |
| UnivUtah              | USA         | Matthew Halverson      |
| UnivUtah              | USA         | Stefan Pulst           |
| UnivUtah              | USA         | Paola Wall             |
| UnivVermont           | USA         | Roman Pettigrew        |
| UnivVermont           | USA         | James Boyd             |
| UnivVirginia          | USA         | Madeline B. Harrison   |
| UnivVirginia          | USA         | Dana Morrissey         |
| UnivWarsaw            | Poland      | Piotr Janik            |
| UnivWarsaw            | Poland      | Natalia Szejko         |

| Site               | Country   | Name                       |
|--------------------|-----------|----------------------------|
| UnivWash           | USA       | Ali Samii                  |
| UnivWash           | USA       | Debra Del Castillo         |
| VanderbiltUniv     | USA       | Elizabeth Huitz            |
| VanderbiltUniv     | USA       | Daniel O. Claassen         |
| VirgenCaminoHosp   | Spain     | Maite Lizarraga Rojas      |
| VirgenCaminoHosp   | Spain     | María Antonia Ramos Arroyo |
| VirginiaCommUniv   | USA       | Claudia Testa              |
| VirginiaCommUniv   | USA       | Ginger Norris              |
| WakeForestUniv     | USA       | Christine O'Neill          |
| WakeForestUniv     | USA       | Francis Walker             |
| WaltonCtrFounTrust | UK        | Louise Pate                |
| WaltonCtrFounTrust | UK        | Rhys Davies                |
| WashingtonUniv     | USA       | Joel S. Perlmutter         |
| WashingtonUniv     | USA       | Stacey Barton              |
| WashingtonUniv     | USA       | Elaine Most                |
| WestSydneyHlthDist | Australia | Clement Loy                |
| WestSydneyHlthDist | Australia | Jillian McMillan           |
| WestSydneyHlthDist | Australia | Therese Alting             |

Note: An Acknowledgement list with email addresses is available to qualified researchers

[CLICK HERE](#) to become a qualified researcher
